# Supplementary material
Source: publisher figshare collection journal article supplement (https://rs.figshare.com/ndownloader/files/23190701)

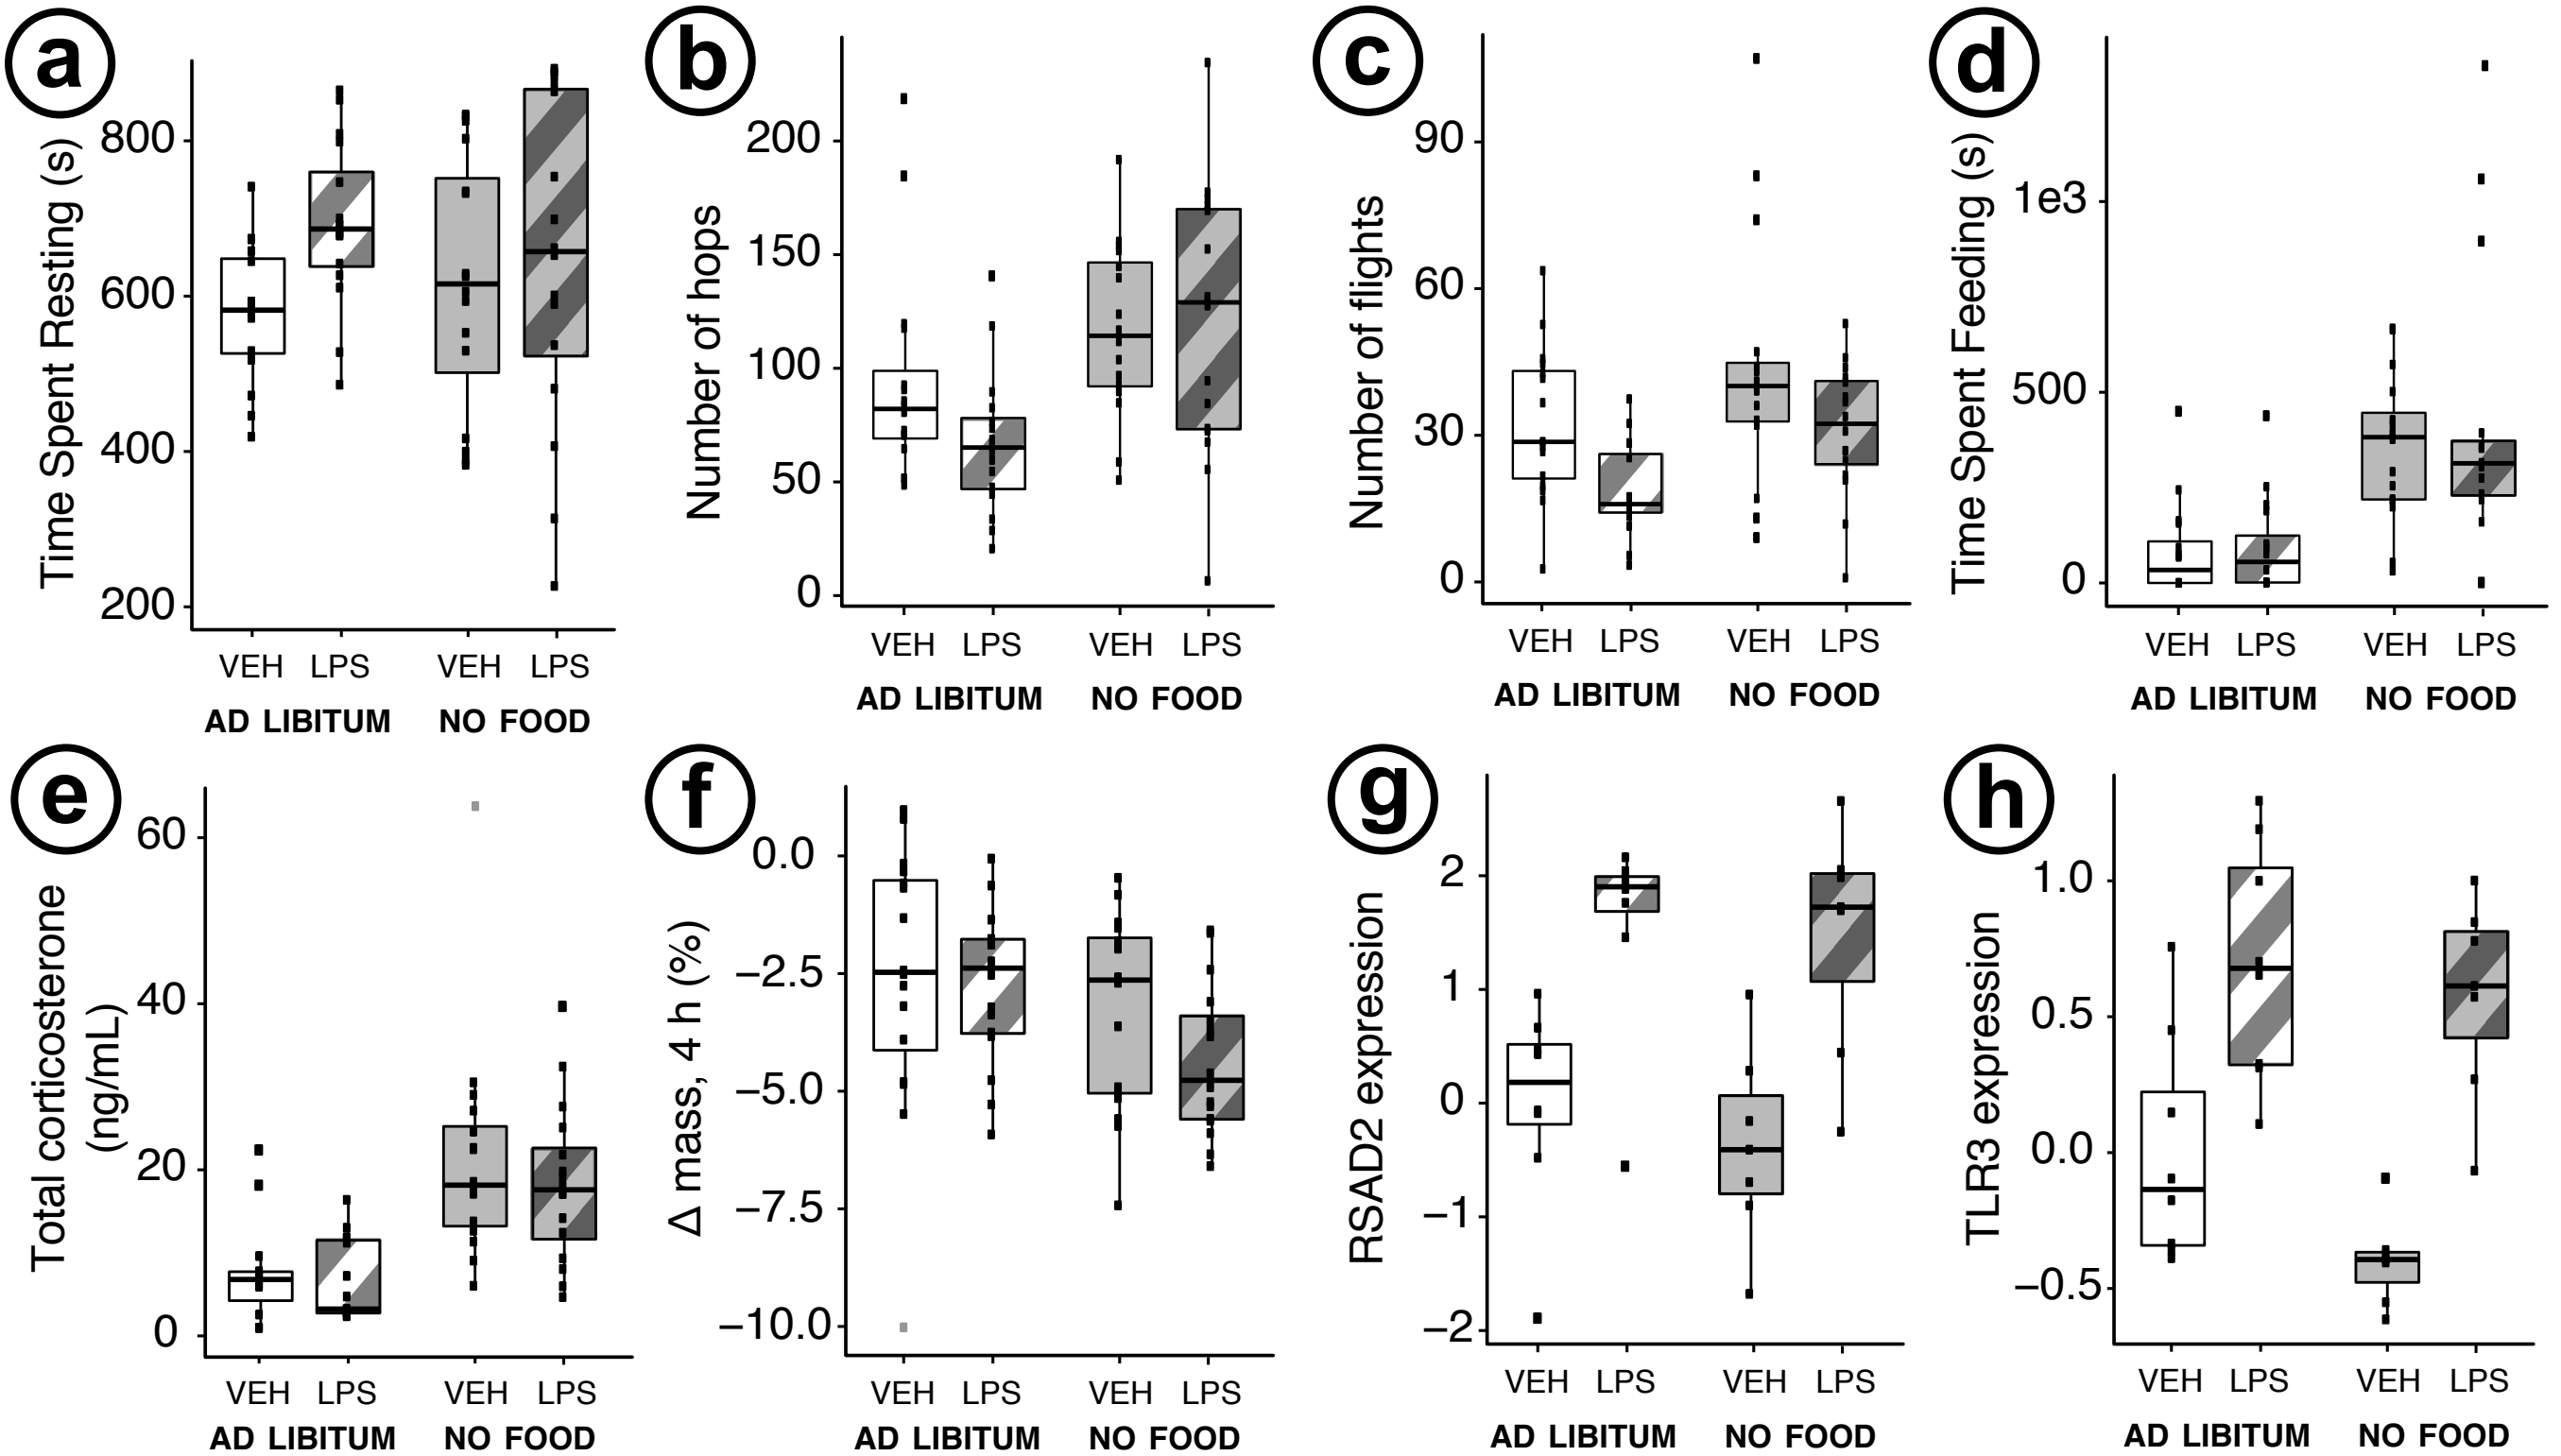

Supplement: Supplementary file 1 [file 23190701]
